# Supplementary material for: Conversion of magnesium waste into a complex magnesium hydride system: Mg(NH2)2–LiH
Source: Royal Society of Chemistry journal article supplement (doi:10.1039/c9se01284b), 2020-01-01
Supplement: c9se01284b1.pdf [file c9se01284b1.pdf]

## Conversion of Magnesium Waste into Complex Magnesium Hydride

### System: $\text{Mg}(\text{NH}_2)_2\text{-LiH}$

Hujun Cao,<sup>a,b\*</sup> Claudio Pistidda,<sup>a</sup> Maria Victoria Castro Riglos,<sup>a,c</sup> Anna-Lisa Chaudhary,<sup>a</sup>  
Giovanni Capurso,<sup>a</sup> Jo-Chi Tseng,<sup>d</sup> Julián Puzkiel,<sup>a,e</sup> Michael T. Wharmby,<sup>d</sup> Thomas  
Gemming,<sup>f</sup> Ping Chen,<sup>b</sup> Thomas Klassen<sup>a</sup> and Martin Dornheim<sup>a</sup>

a. Institute of Materials Research, Materials Technology, Helmholtz-Zentrum Geesthacht GmbH, Max-Planck-Straße 1, 21502, Geesthacht, Germany.

Email: hujun.cao@hzg.de

b. Dalian National Laboratory for Clean Energy Dalian Institute of Chemical Physics, Chinese Academy of Sciences, Dalian 116023, China.

E-Mail: caohujun@dicp.ac.cn; Tel: +86-411-84379583

c. Department of Metalphysics, Consejo Nacional de Investigaciones Científicas y Técnicas (CONICET) and Centro Atómico Bariloche, Av. Bustillo km 9500 S.C. de Bariloche, Argentina.

d. Deutsches Elektronen-Synchrotron (DESY), Notkestraße 85, 22607 Hamburg, Germany.

e. Department of Physicochemistry of Materials, Consejo Nacional de Investigaciones Científicas y Técnicas (CONICET) and Centro Atómico Bariloche, Av. Bustillo km 9500 S.C. de Bariloche, Argentina.

f. Leibniz Institute for Solid State and Materials Research Dresden, Helmholtzstraße 20, 01069 Dresden, Germany.

of <72 characters]

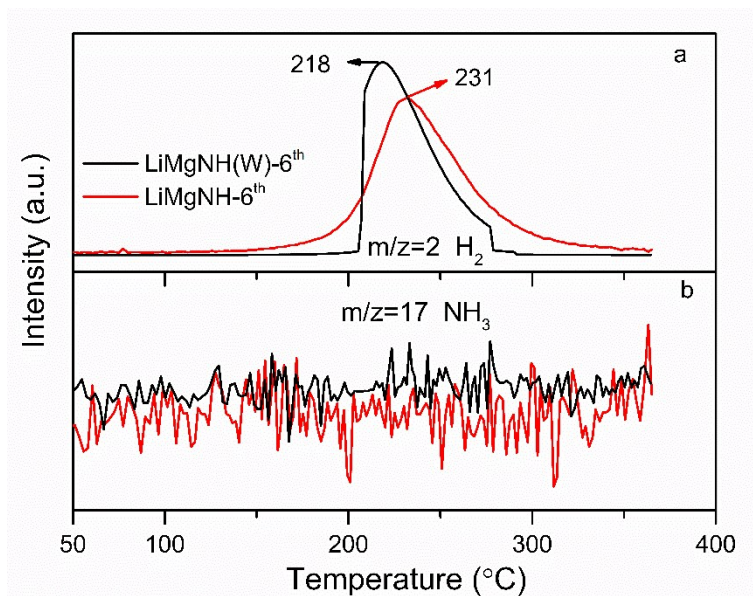

**Figure S 1.** TPD-MS signal of  $H_2$  (a) and  $NH_3$  (enlargement of 100 times) for decomposition of the 6<sup>th</sup>  $LiMgNH(W)-Abs$  and  $LiMgNH-Abs$ ; the samples are heated to 400 °C with a heating rate of 5 °C /min.

of <72 characters]

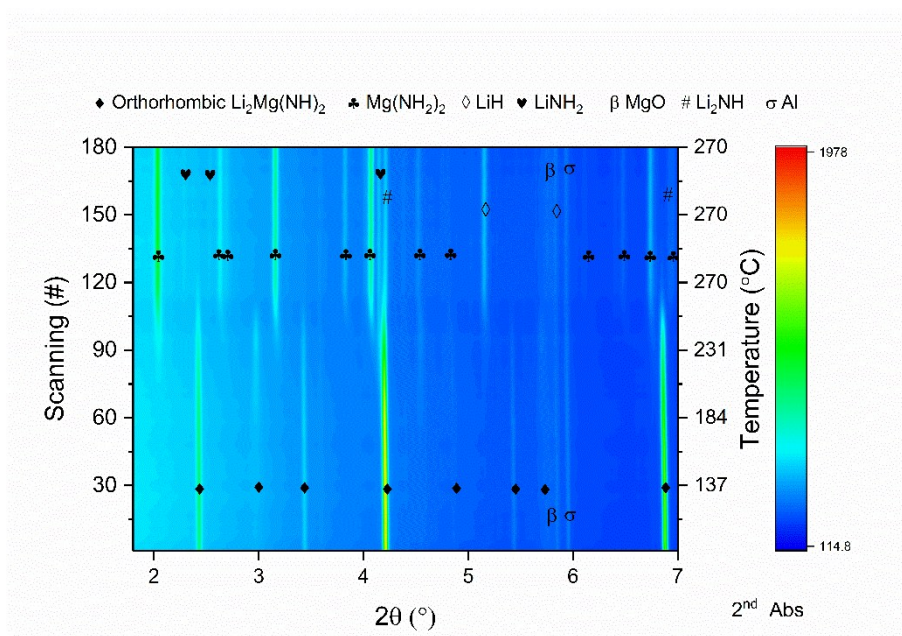

**Figure S 2.** *In situ* XRD of the 2<sup>nd</sup> hydrogenation of the  $\text{LiMgNH}(\text{W})\text{-Des}$ . The sample is heated to 270 °C with a heating rate of 10 °C/min under 180 bar of  $\text{H}_2$ .

of <72 characters]

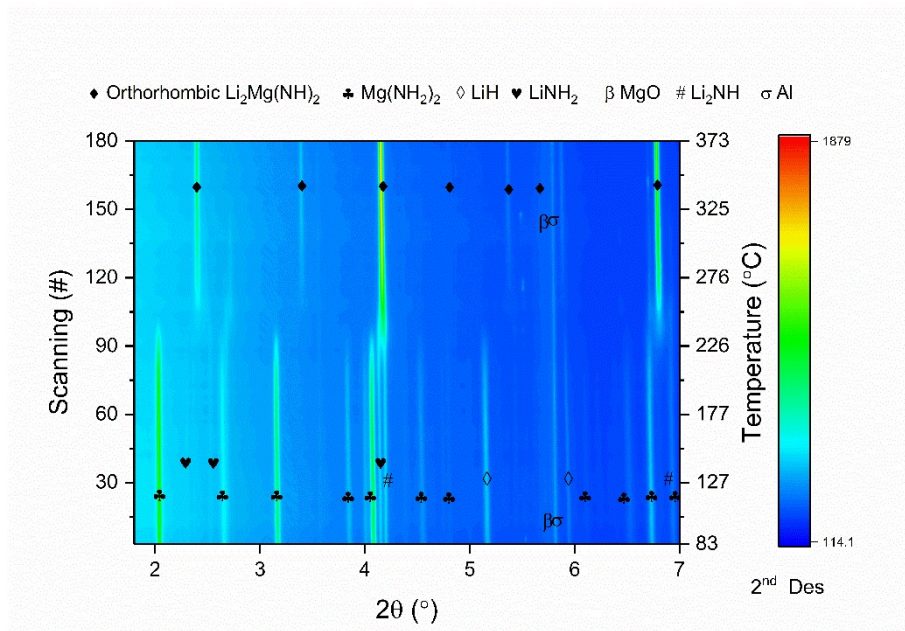

**Figure S 3.** *In situ* XRD of the 2<sup>nd</sup> dehydrogenation of the  $\text{LiMgNH}(\text{W})\text{-Abs}$ . The sample is heated to 270 °C with a heating rate of 10 °C/min under 180 bar of  $\text{H}_2$ .

of <72 characters]

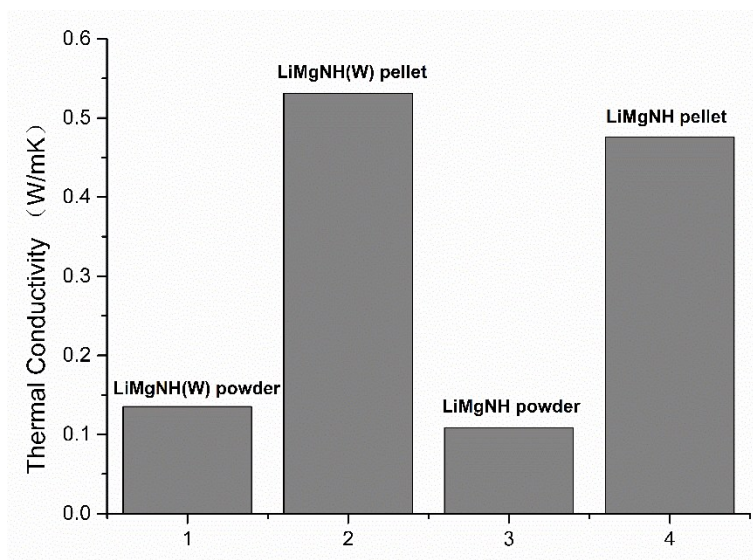

**Figure S 4.** Thermal conductivities of LiMgNH(W)-Abs and LiMgNH-Abs in powder and pellet stages.

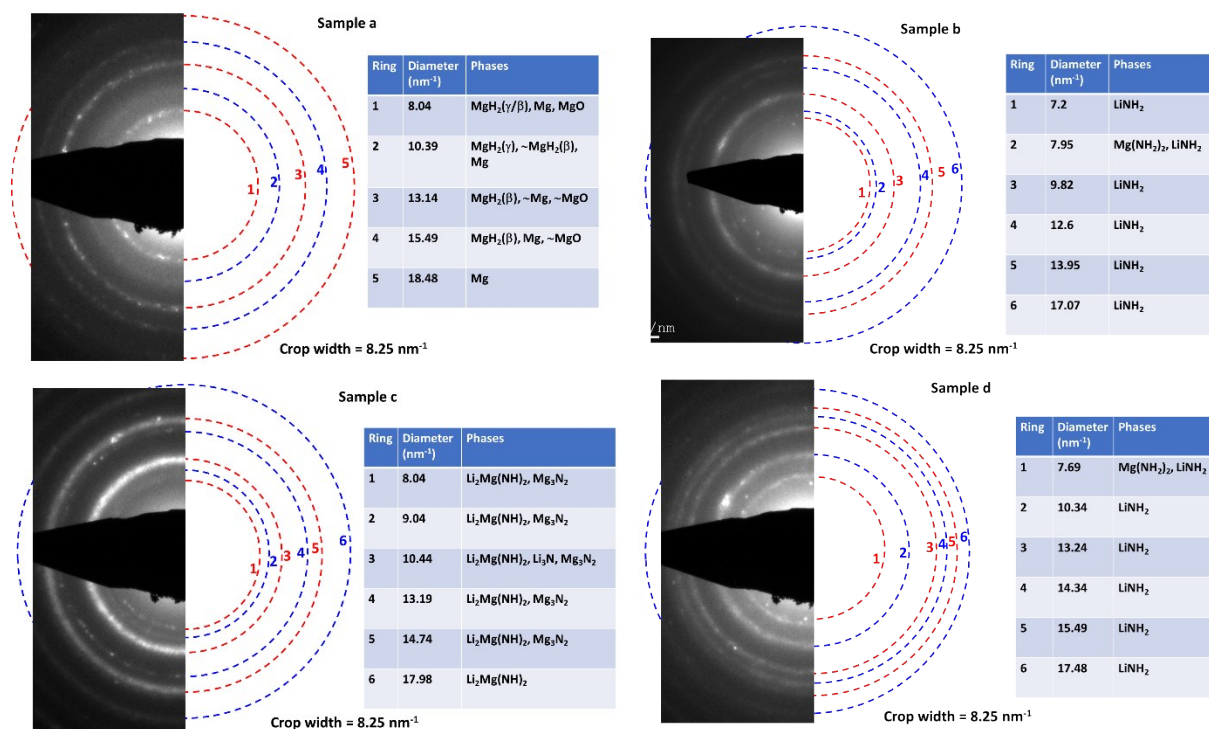

**Figure S5.** General diffraction patterns derived from the HR-TEM of the magnesium alloy AZ91 under different conditions (a) LiMgH(W); (b) LiMgN(W); (c) LiMgNH(W)-Des; (d) hydrogenated LiMgNH(W)-Abs.
